# Supplementary material for: Chronic Toxoplasma infection is associated with distinct alterations in the synaptic protein composition
Source: PubMed Central journal article supplement (PMC6090988; doi:10.1186/s12974-018-1242-1), 2018-08-01
Supplement: 12974_2018_1242_MOESM7_ESM.pdf [file 12974_2018_1242_MOESM7_ESM.pdf]

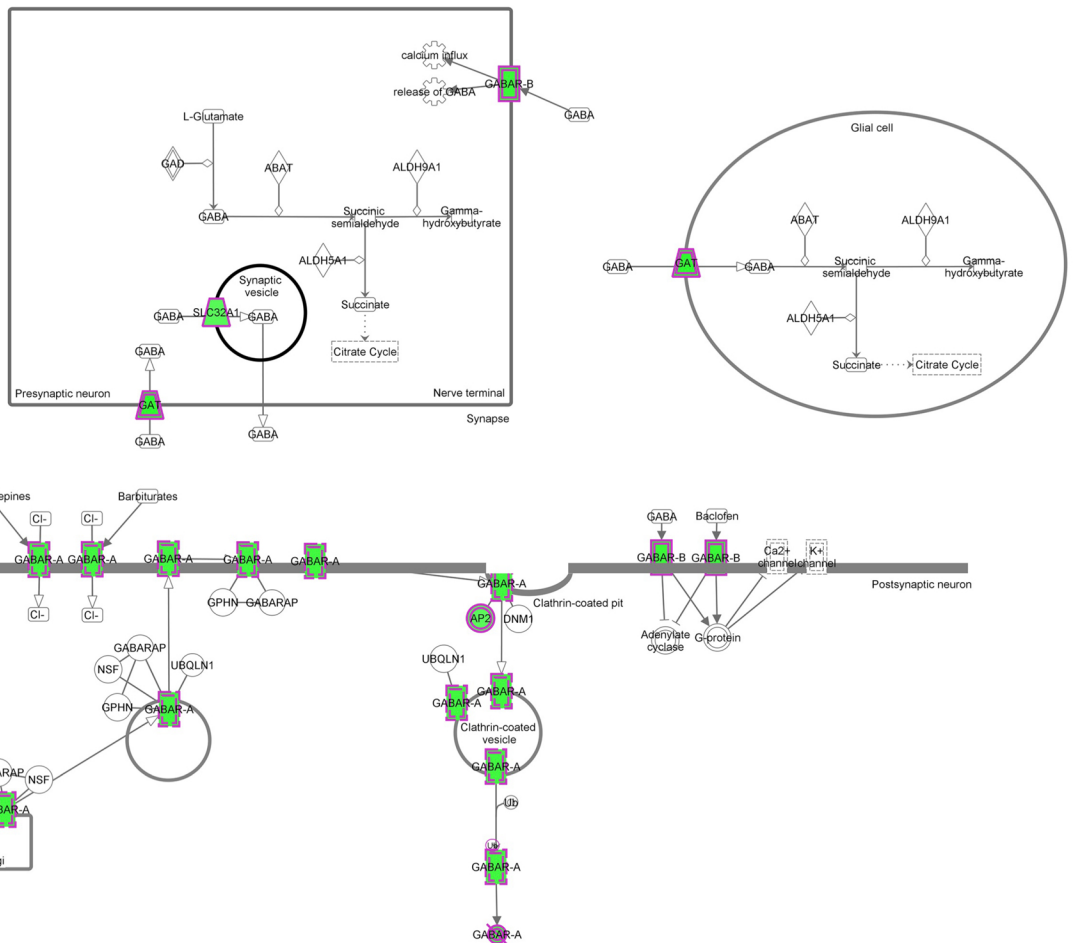

## Additional file 7

### GABA receptor signaling pathway according to IPA®

Symbols are explained in a table (Part B). Filled symbols represent proteins found to be altered in synaptosomes according to our MS data, green indicates reduced levels and red notifies increased levels compared to controls. The networks and functional analyses were generated through the use of QIAGEN's Ingenuity Pathway Analysis (IPA®, QIAGEN Redwood City, [www.qiagen.com/ingenuity](http://www.qiagen.com/ingenuity))

| Symbol                | Synonym(s)                                                     | Location        | Family                          |
|-----------------------|----------------------------------------------------------------|-----------------|---------------------------------|
| ABAT                  | 4-aminobutyrate aminotransferase                               | Cytoplasm       | enzyme                          |
| Adenylatecyclase      | 3',5'-cyclic AMP synthetase                                    | Cytoplasm       | group                           |
| ALDH5A1               | aldehyde dehydrogenase 5 family member A1                      | Cytoplasm       | enzyme                          |
| ALDH9A1               | aldehyde dehydrogenase 9 family member A1                      | Cytoplasm       | enzyme                          |
| AP2                   | AP-2, Clathrin adaptor AP2                                     | Cytoplasm       | complex                         |
| Baclofen              | Apo-Baclofen, Baclon                                           | Other           | chemical drug                   |
| Barbiturates          |                                                                | Other           | chemical - other                |
| Benzodiazepines       |                                                                | Other           | chemical drug                   |
| Ca2+channel           | Voltage-Gated Ca2+ Channel                                     | Plasma Membrane | complex                         |
| calcium influx        |                                                                | Other           | function                        |
| Cl-                   | chloride ion (Cl-)                                             | Other           | chemical - endogenous mammalian |
| DNM1                  | dynamnin 1                                                     | Cytoplasm       | enzyme                          |
| G-protein             | G-protein $\alpha$ - $\beta$ - $\gamma$                        | Cytoplasm       | complex                         |
| GABA                  | $\gamma$ -aminobutyric acid                                    | Other           | chemical - endogenous mammalian |
| GABA-R-A              | GABA type A receptor                                           | Plasma Membrane | complex                         |
| GABA-R-B              | GABA type B receptor                                           | Plasma Membrane | group                           |
| GABARAP               | GABA type A receptor-associated protein                        | Cytoplasm       | transporter                     |
| GAD                   | $\gamma$ -glutamate decarboxylase, Gad65/67                    | Other           | group                           |
| Gamma-hydroxybutyrate | $\gamma$ -Hydroxybutyric acid                                  | Other           | chemical drug                   |
| GAT                   | GABA transporter                                               | Other           | group                           |
| GPHN                  | gephyrin                                                       | Plasma Membrane | enzyme                          |
| K+channel             | potassium channel                                              | Plasma Membrane | group                           |
| L-Glutamate           | L-glutamic acid                                                | Other           | chemical - endogenous mammalian |
| NSF                   | N-ethylmaleimide sensitive factor / vesicle fusing ATPase,     | Cytoplasm       | transporter                     |
| release of GABA       |                                                                | Other           | function                        |
| SLC32A1               | solute carrier family 32 (GABA vesicular transporter) member 1 | Plasma Membrane | transporter                     |
| Succinate             | succinate                                                      | Other           | chemical - endogenous mammalian |
| Succinic semialdehyde | $\gamma$ -oxybutyric acid                                      | Other           | chemical - endogenous mammalian |
| Ub                    | Polyubiquitin, Ub                                              | Cytoplasm       | group                           |
| UBQLN1                | ubiquilin 1                                                    | Cytoplasm       | other                           |
