# Supplementary material for: Chronic Toxoplasma infection is associated with distinct alterations in the synaptic protein composition
Source: Springer Nature journal article supplement (doi:10.1186/s12974-018-1242-1), 2018-08-01
Supplement: MOESM6 [file 15994350]

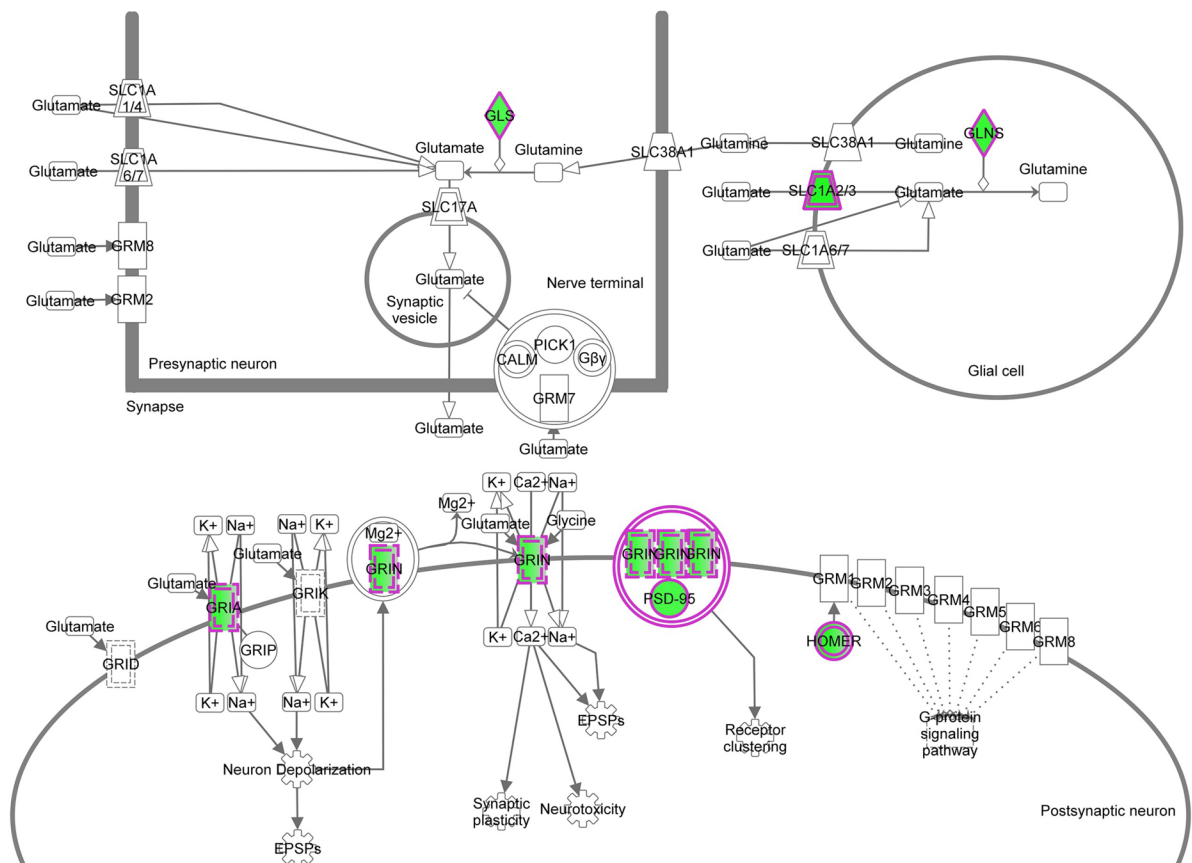

## Additional file 6

### Glutamate receptor signaling pathway according to IPA®

Symbols are explained in a table (Part B). Filled symbols represent proteins found to be altered in synaptosomes according to our MS data, green indicates reduced levels and red notifies increased levels compared to controls. The networks and functional analyses were generated through the use of QIAGEN's Ingenuity Pathway Analysis (IPA®, QIAGEN Redwood City, [www.qiagen.com/ingenuity](http://www.qiagen.com/ingenuity)).

| Symbol                             | Synonym(s)                                     | Location        | Family                          |
|------------------------------------|------------------------------------------------|-----------------|---------------------------------|
| Ca2+                               | calcium ion (Ca2+)                             | Other           | chemical - endogenous mammalian |
| CALM                               | CALM, Cam                                      | Cytoplasm       | group                           |
| Calmodulin-G protein βγ-Grm7-Pick1 | Calmodulin-G protein β γ-Grm7-Pick1            | Plasma Membrane | complex                         |
| EPSPs                              |                                                | Other           | function                        |
| Gβγ                                | G-protein β/γ                                  | Cytoplasm       | complex                         |
| GLNS                               | Glutamine Synthetase                           | Cytoplasm       | enzyme                          |
| GLS                                | glutaminase                                    | Cytoplasm       | enzyme                          |
| Glutamate                          | L-glutamate                                    | Other           | chemical - endogenous mammalian |
| Glutamine                          | L-glutamine                                    | Other           | chemical - endogenous mammalian |
| Glycine                            | glycine                                        | Other           | chemical - endogenous mammalian |
| GRIA                               | AMPA, GluA, iGluR                              | Plasma Membrane | group                           |
| GRID                               |                                                | Plasma Membrane | group                           |
| GRIK                               | kainate glutamate receptor                     | Plasma Membrane | group                           |
| GRIN                               | GRIN, NMDAR, NMDARs                            | Plasma Membrane | complex                         |
| Grin-Grin-Grin-Dlg4                |                                                | Plasma Membrane | complex                         |
| Grin-Mg2+                          | Grin-Mg2+                                      | Plasma Membrane | complex                         |
| GRIP                               | glutamate receptor interacting protein 1, GRIP | Plasma Membrane | transcription regulator         |
| GRM1                               | Metabotropic glutamate receptor 1a             | Plasma Membrane | G-protein coupled receptor      |
| GRM2                               | Metabotropic glutamate receptor 2              | Plasma Membrane | G-protein coupled receptor      |
| GRM3                               | Metabotropic glutamate receptor 3              | Plasma Membrane | G-protein coupled receptor      |
| GRM4                               | Metabotropic glutamate receptor 4              | Plasma Membrane | G-protein coupled receptor      |
| GRM5                               | Metabotropic glutamate receptor 5a             | Plasma Membrane | G-protein coupled receptor      |
| GRM6                               | Metabotropic glutamate receptor 6              | Plasma Membrane | G-protein coupled receptor      |
| GRM7                               | Metabotropic glutamate receptor 7              | Plasma Membrane | G-protein coupled receptor      |
| GRM8                               | Metabotropic glutamate receptor 8              | Plasma Membrane | G-protein coupled receptor      |
| HOMER                              |                                                | Cytoplasm       | group                           |
| K+                                 | potassium ion (K+)                             | Other           | chemical - endogenous mammalian |
| Mg2+                               | magnesium ion (Mg2+)                           | Other           | chemical - endogenous mammalian |
| Na+                                | sodium cation (Na+)                            | Other           | chemical - endogenous mammalian |
| Neuron Depolarization              |                                                | Other           | function                        |
| Neurotoxicity                      |                                                | Other           | function                        |
| PICK1                              | protein interacting with C kinase 1            | Cytoplasm       | enzyme                          |
| PSD-95                             | PSD-95                                         | Plasma Membrane | kinase                          |
| Receptorclustering                 |                                                | Other           | function                        |
| SLC17A                             |                                                | Plasma Membrane | group                           |
| SLC1A1/4                           |                                                | Plasma Membrane | group                           |
| SLC1A2/3                           |                                                | Plasma Membrane | group                           |
| SLC1A6/7                           |                                                | Plasma Membrane | group                           |
| SLC38A1                            | solute carrier family 38 member 1              | Plasma Membrane | transporter                     |
| Synapticplasticity                 |                                                | Other           | function                        |
