# Supplementary material for: Chronic Toxoplasma infection is associated with distinct alterations in the synaptic protein composition
Source: Springer Nature journal article supplement (doi:10.1186/s12974-018-1242-1), 2018-08-01
Supplement: MOESM10 [file 15994350]

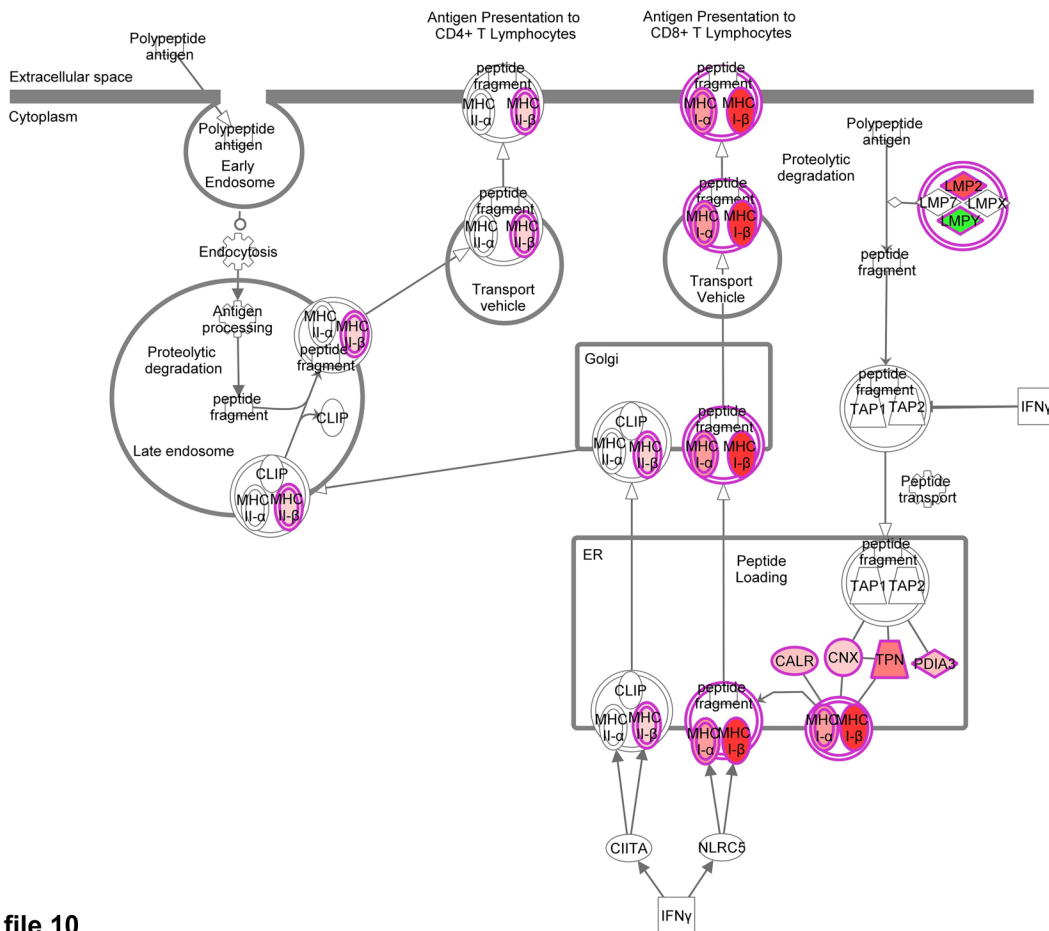

## Additional file 10

### Antigen presentation pathway according to IPA®

Symbols are explained in a table (Part B). Filled symbols represent proteins found to be altered in synaptosomes according to our MS data, green indicates reduced levels and red notifies increased levels compared to controls. The networks and functional analyses were generated through the use of QIAGEN's Ingenuity Pathway Analysis (IPA®, QIAGEN Redwood City, [www.qiagen.com/ingenuity](http://www.qiagen.com/ingenuity)).

| Symbol                       | Synonym(s)                                                         | Location            | Family                  |
|------------------------------|--------------------------------------------------------------------|---------------------|-------------------------|
| Antigenprocessing            |                                                                    | Other               | function                |
| B2m-Mhc1a-peptide fragment   | B2m-Mhc1a-peptide fragment                                         | Plasma Membrane     | complex                 |
| CALR                         | Calreticulin                                                       | Cytoplasm           | transcription regulator |
| CD74-Mhc2a-Mhc2b             |                                                                    | Cytoplasm           | complex                 |
| CIITA                        | Class II major histocompatibility complex transactivator           | Nucleus             | transcription regulator |
| CLIP                         | CD74 antigen (H-2 class II histocompatibility antigen gamma chain) | Plasma Membrane     | transmembrane receptor  |
| CNX                          | Calnexin                                                           | Cytoplasm           | other                   |
| Endocytosis                  |                                                                    | Other               | function                |
| IFNγ                         | Interferon gamma (Interferon γ)                                    | Extracellular Space | cytokine                |
| LMP2                         | Large multifunctional protease 2 (LMP2, proteasome subunit beta 9) | Cytoplasm           | peptidase               |
| LMP7                         | Large multifunctional protease-7 (LMP7, proteasome subunit beta 8) | Cytoplasm           | peptidase               |
| LMPX                         | Proteasome subunit beta 5 (LMPX, proteasome 20S X)                 | Cytoplasm           | peptidase               |
| LMPY                         | Proteasome subunit beta 6 (LMPY, proteasome subunit delta)         | Nucleus             | peptidase               |
| MHC I-α                      | MHC class I alpha                                                  | Plasma Membrane     | group                   |
| MHC I-β                      | Beta-2-microglobulin (MHC class I beta, β2M)                       | Plasma Membrane     | transmembrane receptor  |
| MHC II-α                     | MHC II alpha chain                                                 | Plasma Membrane     | group                   |
| MHC II-β                     | MHC II beta chain                                                  | Plasma Membrane     | group                   |
| Mhc2a-Mhc2b-peptide fragment | Mhc2a-Mhc2b-peptide fragment                                       | Plasma Membrane     | complex                 |
| NLRC5                        | NLR family CARD domain containing 5                                | Cytoplasm           | transcription regulator |
| PDIA3                        | Protein disulfide-isomerase A3 (GRP58)                             | Cytoplasm           | peptidase               |
| Peptide transport            |                                                                    | Other               | function                |
| peptide-Tap1-Tap2            |                                                                    | Cytoplasm           | complex                 |
| Psmb5-Psmb6-Psmb8-Psmb9      |                                                                    | Cytoplasm           | complex                 |
| TAP1                         | Antigen peptide transporter 1 ( APT1, peptide transporter TAP1)    | Cytoplasm           | transporter             |
| TAP2                         | Antigen peptide transporter 2 ( APT2, peptide transporter TAP2)    | Cytoplasm           | transporter             |
| TPN                          | TAP binding protein (Tapasin)                                      | Cytoplasm           | transporter             |
