# Supplementary material for: Chronic Toxoplasma infection is associated with distinct alterations in the synaptic protein composition
Source: Springer Nature journal article supplement (doi:10.1186/s12974-018-1242-1), 2018-08-01
Supplement: MOESM11 [file 15994350]

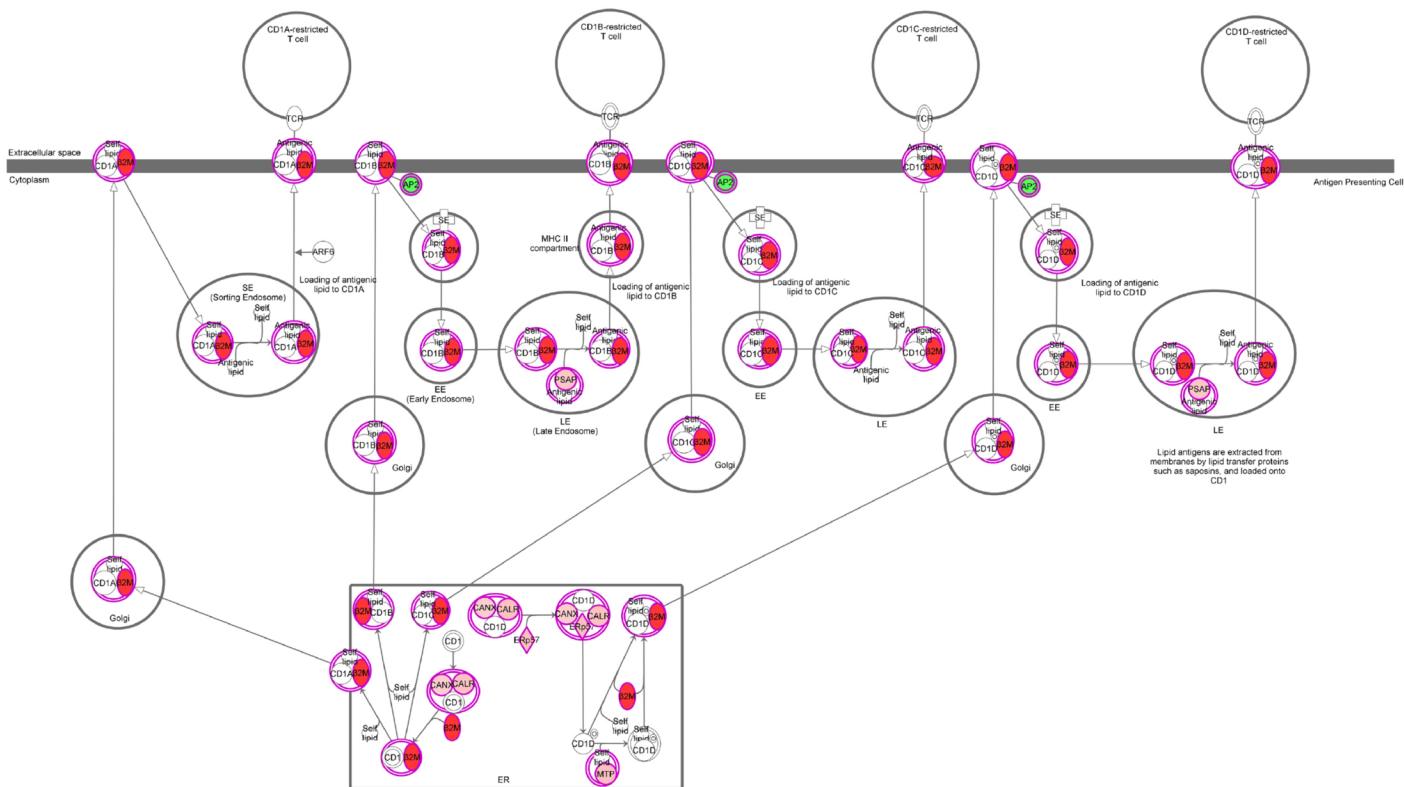

## Additional file 11

### Lipid antigen presentation pathway according to IPA®

Symbols are explained in a table (Part B). Filled symbols represent proteins found to be altered in synaptosomes according to our MS data, green indicates reduced levels and red notifies increased levels compared to controls. The networks and functional analyses were generated through the use of QIAGEN's Ingenuity Pathway Analysis (IPA®, QIAGEN Redwood City, [www.qiagen.com/ingenuity](http://www.qiagen.com/ingenuity)).

| Symbol                   | Synonym(s)                                    | Location            | Family                  |
|--------------------------|-----------------------------------------------|---------------------|-------------------------|
| β2M                      | Beta-2-microglobulin (MHC class I beta, β2M)  | Plasma Membrane     | transmembrane receptor  |
| Antigenic lipid-CD1A-β2M | Antigenic lipid-CD1A-beta2M                   | Plasma Membrane     | complex                 |
| Antigenic lipid-CD1B-β2M | Antigenic lipid-CD1B-beta2M                   | Plasma Membrane     | complex                 |
| Antigenic lipid-CD1C-β2M | Antigenic lipid-CD1C-beta2M                   | Plasma Membrane     | complex                 |
| Antigenic lipid-CD1D-β2M | Antigenic lipid-CD1D-beta2M                   | Plasma Membrane     | complex                 |
| AP2                      | Clathrin adaptor AP2                          | Cytoplasm           | complex                 |
| ARF6                     | ADP-ribosylation factor 6                     | Plasma Membrane     | transporter             |
| CALR                     | Calreticulin                                  | Cytoplasm           | transcription regulator |
| CANX                     | Calnexin                                      | Cytoplasm           | other                   |
| CANX-CALR-CD1            |                                               | Cytoplasm           | complex                 |
| CD1                      | CD1-Family of T-cell surface glycoprotein     | Plasma Membrane     | group                   |
| CD1-β2MComplex           | CD1-beta2M Complex                            | Cytoplasm           | complex                 |
| CD1A                     | T-cell surface glycoprotein CD1a              | Plasma Membrane     | other                   |
| CD1B                     | T-cell surface glycoprotein CD1b              | Plasma Membrane     | other                   |
| CD1C                     | T-cell surface glycoprotein CD1c              | Plasma Membrane     | other                   |
| CD1D                     | T-cell surface glycoprotein CD1d              | Plasma Membrane     | other                   |
| CD1D-CANX-CALR           |                                               | Cytoplasm           | complex                 |
| CD1D-CANX-CALR-ERp57     |                                               | Cytoplasm           | complex                 |
| ERp57                    | Protein disulfide-isomerase A3 (PDIA3, GRP58) | Cytoplasm           | peptidase               |
| PSAP                     | Prosaposin (Sphingolipid activator protein)   | Extracellular Space | other                   |
| PSAP-Antigenic lipid     |                                               | Cytoplasm           | complex                 |
| Self lipid-CD1A-β2M      | Self lipid-CD1A-beta2M                        | Cytoplasm           | complex                 |
| Self lipid-CD1B-β2M      | Self lipid-CD1B-beta2M                        | Cytoplasm           | complex                 |
| Self lipid-CD1C-β2M      | Self lipid-CD1C-beta2M                        | Cytoplasm           | complex                 |
| Self lipid-CD1D          | Self lipid-CD1D                               | Cytoplasm           | complex                 |
| Self lipid-CD1D-β2M      | Self lipid-CD1D-beta2M                        | Cytoplasm           | complex                 |
| TCR                      | T-cell receptor                               | Plasma Membrane     | complex                 |
